# Supplementary material for: Cloning and Functional Characterization of Two 4-Coumarate: CoA Ligase Genes from Selaginella moellendorffii
Source: PubMed Central journal article supplement (PMC6017068; doi:10.3390/molecules23030595), 2018-03-07
Supplement: molecules-23-00595-s001.pdf [file molecules-23-00595-s001.pdf]

**Table S1**

Primer sequences used in this research.

| Primer name | Primer sequences (5'-3')             |
|-------------|--------------------------------------|
| Sm4CL1-F    | ATGGCGACGGATCAGCATGT                 |
| Sm4CL1-R    | CTAAGAGGAAAGTCTACTTC                 |
| Sm4CL2-F    | ATGCCACATTTGCGCAATCC                 |
| Sm4CL2-R    | TTAGTTTAGCTCCAGCTTGC                 |
| Sm4CL1-pETF | CGGGATCCATGGCGACGGATCAGCATGT         |
| Sm4CL1-pETR | CCAAGCTTCTAAGAGGAAAGTCTACTTC         |
| Sm4CL2-pETF | CGCGATATCATGCCACATTTGCGCAATCC        |
| Sm4CL2-pETR | ATAAGAATGCGGCCGCTTAGTTTAGCTCCAGCTTGC |
| Sm4CL1-RTF  | GAGGTGTTTCATTGTGGACCG                |
| Sm4CL1-RTR  | TTGGAGACGAAGCCCTTGAT                 |
| Sm4CL2-RTF  | AACCCGATCGTGGACAAGTA                 |
| Sm4CL2-RTR  | CATACCCCTGACCGAGTACC                 |
| Smactin-RTF | ACTGGGACGACATGGAGAAG                 |
| Smactin-RTR | CCGCCTGAATAGCAACGTAC                 |

**Table S2**

Accession numbers of amino acid sequences used for phylogenetic reconstruction.

| Sequence                   | Accession No. |
|----------------------------|---------------|
| Physcomitrella patens 4CL1 | ABY21312      |

|                            |              |
|----------------------------|--------------|
| Physcomitrella patens 4CL4 | ABY21315     |
| Physcomitrella patens 4CL2 | ABY21313     |
| Physcomitrella patens 4CL3 | ABY21314     |
| Pinus radiata 4CL          | ACF35279     |
| Pinus taeda 4CL            | AAB42383     |
| Arabidopsis thaliana 4CL1  | NP_001077697 |
| Arabidopsis thaliana 4CL2  | NP_188761    |
| Populus tomentosa 4CL      | AAL02144     |
| Glycine max 4CL1           | NP_001236418 |
| Medicago truncatula 4CL    | XP_003637266 |
| Glycine max 4CL2           | NP_001236236 |
| Glycine max 4CL3           | AAC97389     |
| Glycine max 4CL4           | CAC36095     |
| Arabidopsis thaliana 4CL3  | NP_849844    |
| Oryza sativa 4CL1          | XP_015650724 |
| Oryza sativa 4CL2          | XP_015624111 |
| Oryza sativa 4CL3          | XP_015625716 |
| Oryza sativa 4CL4          | XP_015643415 |
| Oryza sativa 4CL5          | XP_015650830 |
| Zea mays 4CL               | AAS67644     |

---
